# Supplementary material
Source: PubMed Central journal article supplement (PMC2947215)
Supplement: JCI40440sd.pdf [file JCI40440sd.pdf]

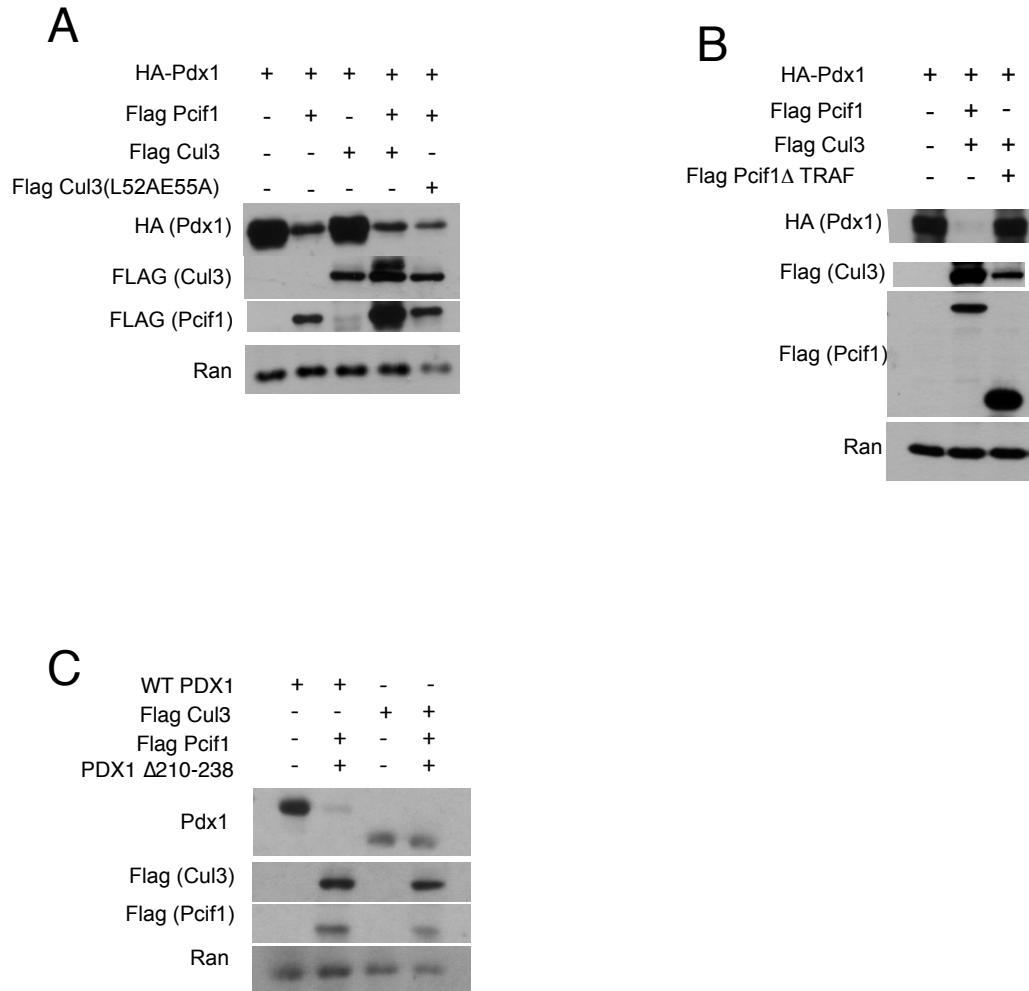

**Supplemental Figure 1. Input western blots of *in vivo* ubiquitination assays** (A) Corresponds to Figure 1B (B) Corresponds to Figure 1C. (C) Corresponds to Figure 1D.

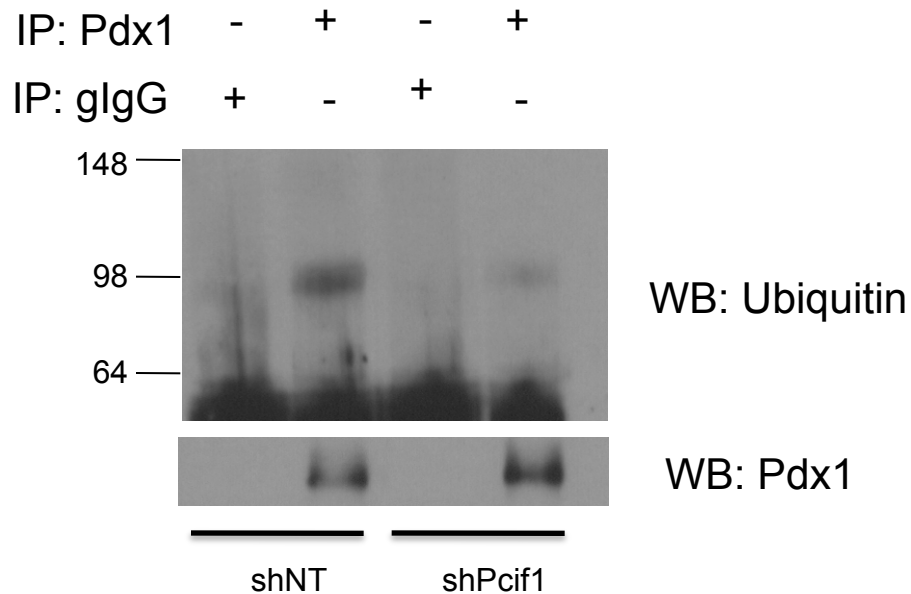

**Supplemental Figure 2. Analysis Pdx1 ubiquitination in Min6 cells.** Min6 cells were nucleofected with plasmids expressing an shRNA targeting Pcf1 or a non-targeting control. After 24 hour culture in 2mM glucose, and 8 hour exposure to LLnL, lysates were subjected to immunoprecipitation with anti-Pdx1 antibody or matching IgG. Western blot is probed for ubiquitin (upper panel) or Pdx1 (lower panel)

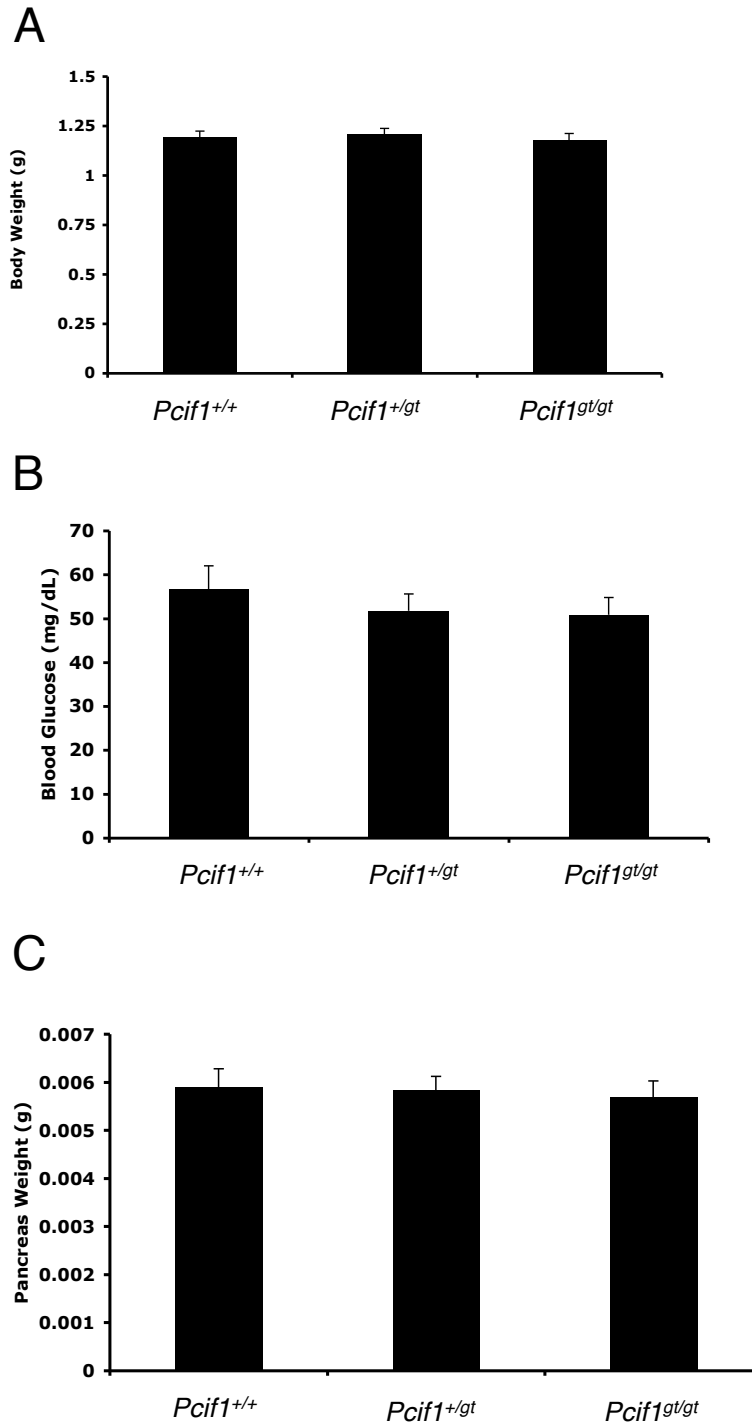

**Supplemental Figure 3. Analysis of e18.5 *Pcif1<sup>gt</sup>* embryos.** (A) Body weight. (B) Blood glucose (C) Pancreas wet weight. (n=21-33 per group)

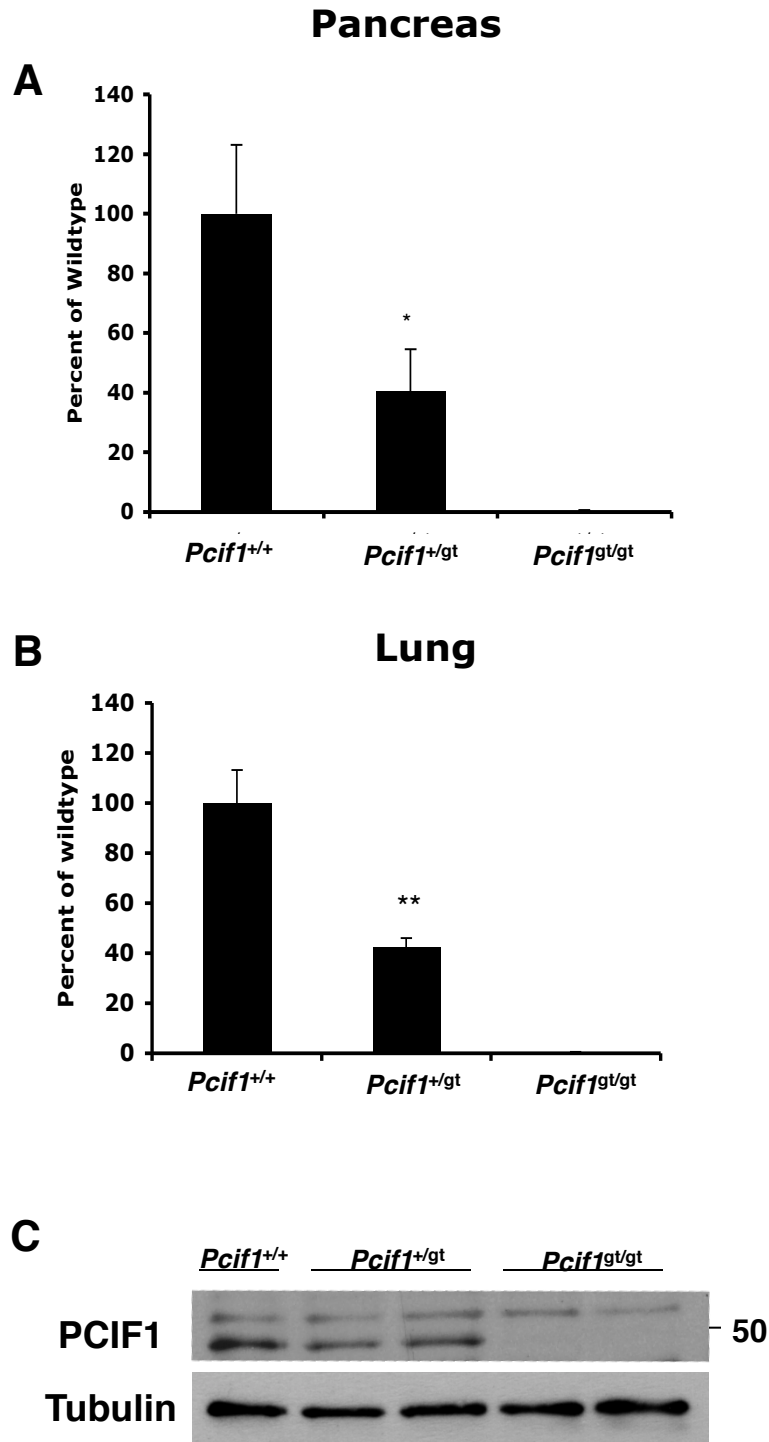

**Supplemental Figure 4. *Pcif1*<sup>gt</sup> disrupts *Pcif1* expression.** (A, B) *Pcif1* transcript measured by quantitative PCR in e18.5 pancreas (A) and lung (B), normalized to HPRT, n=5-6 for pancreas, 10-16 for lung. *Pcif1* transcript was undetectable in all *Pcif1*<sup>gt/gt</sup> samples. \* p<0.05, \*\*p<0.01 compared to +/+ littermates. (C) Western blot analysis of e18.5 kidney lysate. Blots probed for *Pcif1* and tubulin.

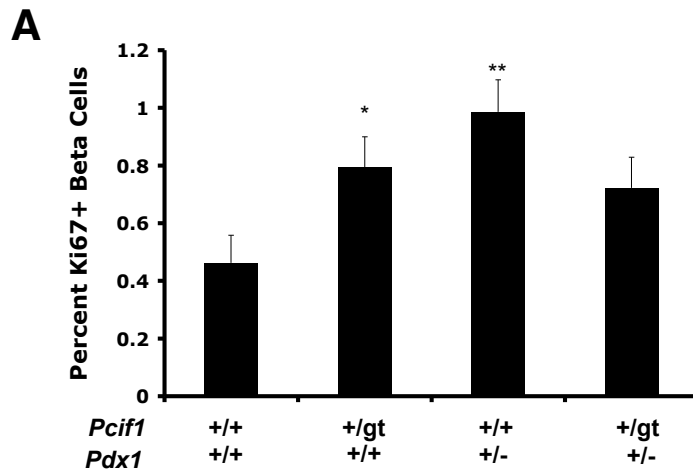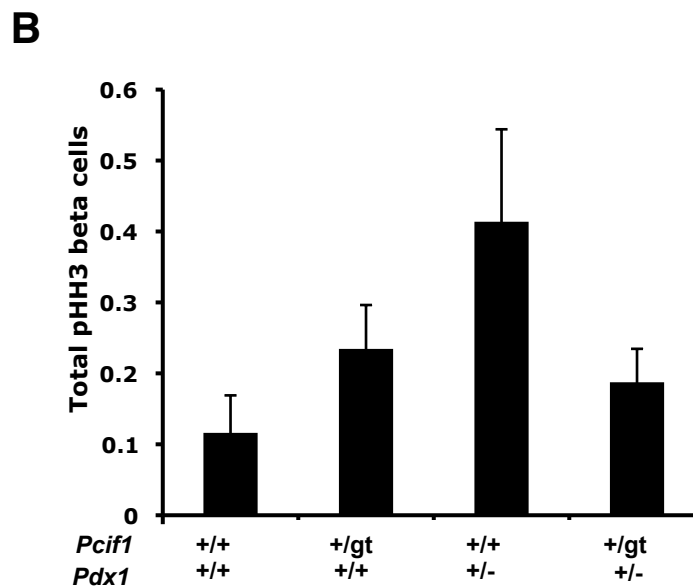

**Supplemental Figure 5. *Pcif1* deficiency increases beta cell replication**

(A) Beta cell replication quantified as percentage of Ki67 positive beta cells. n=5-8/group, an average of 2,381 cells counted per animal. \*p<0.05, \*\*p<0.01 compared to wildtype. (B) Beta cell replication quantified as percentage of phospho-histone H3 positive beta cells. n=5-8 per group, an average of 2,715 cells counted per animal.

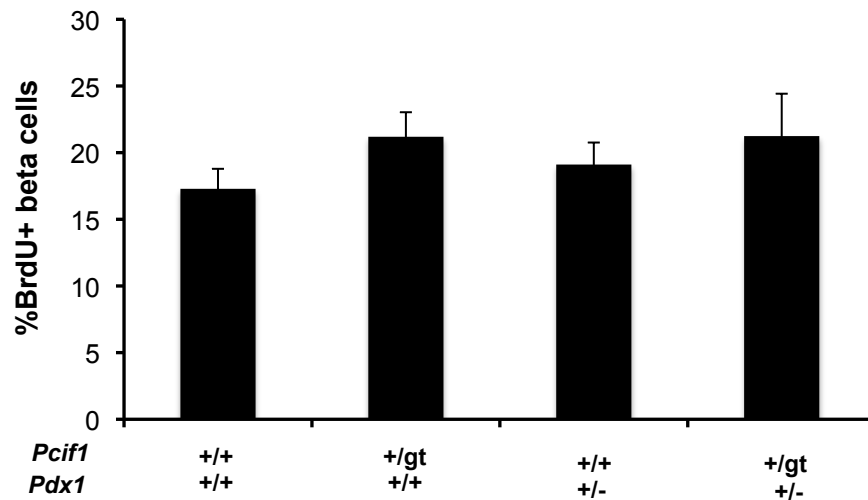

**Supplemental Figure 6. Effect of *Pcif1* on beta cell replication is age dependent**

(A) Beta cell replication quantified as percentage of BrdU positive beta cells. 5 week old mice harvested after one week of BrdU administration. n=6-11/group, an average of 1,119 cells counted per animal.

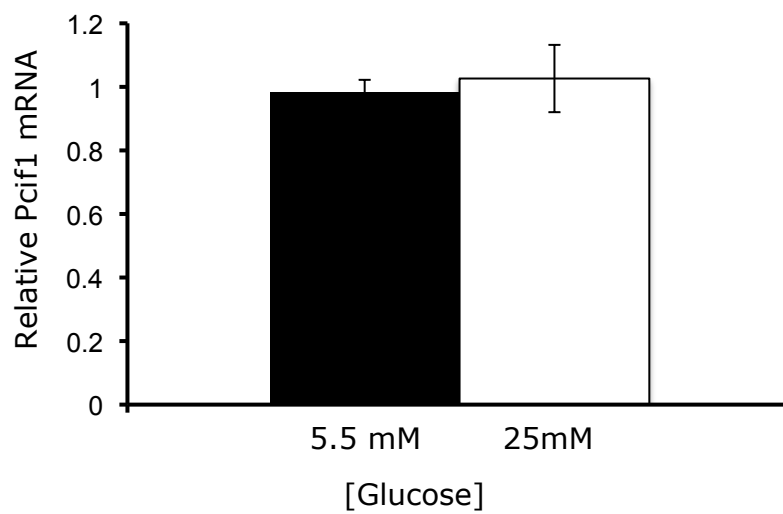

**Supplemental Figure 7. Pcif1 expression in Min6 cells**

Pcif1 mRNA level in Min6 cells maintained in low (5.5mM) or high (25mM) glucose, normalized to HPRT. n=6 per group

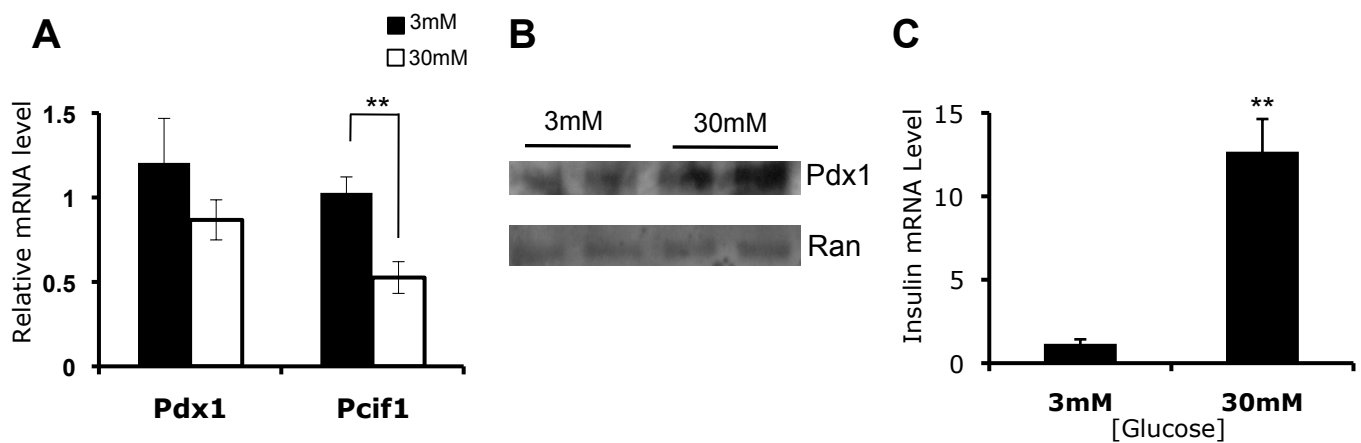

### Supplemental Figure 8. Glucose regulation of Pcf1 in mouse islets

(A) QPCR measurement of Pcf1 and Pdx1 mRNA from islets cultured overnight in 3mM or 30mM glucose (n=6-7 per condition, \*\*p<0.01). (B) Western blot of lysates from islets cultured overnight in 3 or 30mM glucose, blot is probed for Pdx1 and Ran (loading control). (C) QPCR measurement of insulin mRNA from islets cultured overnight (n=6-7 per condition, \*\*p<0.01).
